# Supplementary material for: Systematic review of neighborhood socioeconomic indices studied across the cancer control continuum
Source: PubMed Central journal article supplement (PMC9119356; doi:10.1002/cam4.4601), 2022-02-14
Supplement: CAM4-11-2125-s002.pdf [file CAM4-11-2125-s002.pdf]

## Survival Associations Found in Studies With and Without Individual-Level Adjustments

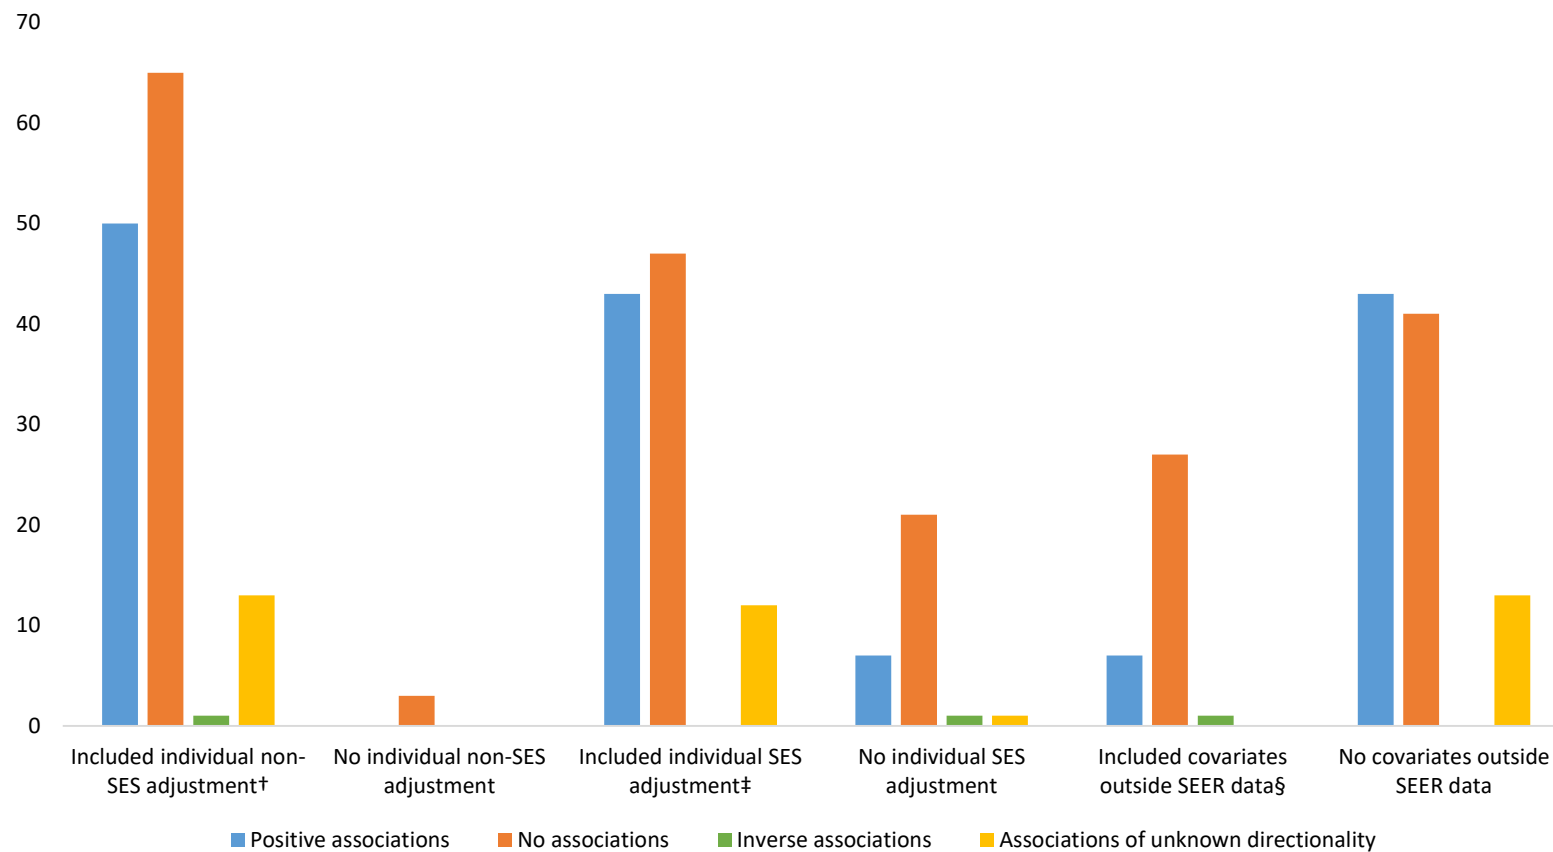

<sup>†</sup>Individual non-SES adjustments include non-SES variables that are typically included in SEER registries (e.g., age, diagnosis year).

<sup>‡</sup>Individual SES adjustments include race/ethnicity, education, etc.

<sup>§</sup>Covariates outside variables included in SEER data include both SES variables (e.g., income) and non-SES variables (e.g., smoking history).
